# Supplementary material for: Abscisic Acid Synthesis and Signaling during the Ripening of Raspberry (Rubus idaeus ‘Heritage’) Fruit
Source: MDPI journal article supplement (doi:10.3390/plants12091882), 2023-05-05
Supplement: s1 [file s1]

**Table S1.** *RiNCED* gene family identified in *Rubus idaeus* genome.

| Gene name      | Gene accession | Scaffold    | Coordinates     | Strand | Gene (bp) | CDS (bp) | Protein (aa) |
|----------------|----------------|-------------|-----------------|--------|-----------|----------|--------------|
| <i>RiNCED1</i> | Rr029649.t1    | L2SC0000012 | 93872 - 91414   | -      | 2458      | 1845     | 614          |
| <i>RiNCED2</i> | Rr040293.t1    | XFSC0000016 | 290470 – 287800 | -      | 2670      | 1815     | 604          |
| <i>RiNCED3</i> | Rr017595.t1    | SC0000182   | 61755 - 59750   | -      | 2005      | 1842     | 613          |
