# Supplementary material for: Abscisic Acid Synthesis and Signaling during the Ripening of Raspberry (Rubus idaeus ‘Heritage’) Fruit
Source: MDPI journal article supplement (doi:10.3390/plants12091882), 2023-05-05
Supplement: s1 [file s1]

**Table S2.** *RiPYL* gene family identified in *Rubus idaeus* genome.

| Gene name     | Gene accession | Scaffold    | Coordinates       | Strand | Gene (bp) | CDS (bp) | Protein (aa) |
|---------------|----------------|-------------|-------------------|--------|-----------|----------|--------------|
| <i>RiPYL1</i> | Rr06488.t1     | L2SC0000042 | 121083 - 122026   | +      | 944       | 633      | 210          |
| <i>RiPYL2</i> | Rr01684.t1     | L3SC0000019 | 807468 - 806332   | -      | 1137      | 573      | 190          |
| <i>RiPYL3</i> | Rr026998.t1    | XPSC0002114 | 139134 - 138300   | -      | 950       | 651      | 216          |
| <i>RiPYL4</i> | Rr05635.t1     | L2SC0000037 | 359615 - 361019   | +      | 1405      | 657      | 218          |
| <i>RiPYL5</i> | Rr019990.t1    | XFSC0000017 | 335895 - 336644   | +      | 750       | 525      | 174          |
| <i>RiPYL6</i> | Rr019991.t1    | XFSC0000017 | 339324 - 338476   | -      | 849       | 483      | 160          |
| <i>RiPYL7</i> | Rr030173.t1    | L3SC0000013 | 1287089 - 1289189 | +      | 2101      | 579      | 192          |
| <i>RiPYL8</i> | -              | SC0000043   | 1170471 - 1173443 | +      | 2973      | 555      | 184          |
| <i>RiPYL9</i> | -              | SC0000030   | 583417 - 582475   | -      | 943       | 642      | 213          |
