# Supplementary material for: Abscisic Acid Synthesis and Signaling during the Ripening of Raspberry (Rubus idaeus ‘Heritage’) Fruit
Source: MDPI journal article supplement (doi:10.3390/plants12091882), 2023-05-05
Supplement: s1 [file s1]

**Table S3.** Information about NCED protein sequences used for phylogenetic analysis.

| Species                           | Protein name | Accession NCBI |
|-----------------------------------|--------------|----------------|
| <i>Arabidopsis thaliana</i>       | AtNCED2      | NP_193569.1    |
| <i>Arabidopsis thaliana</i>       | AtNCED3      | NP_188062.1    |
| <i>Arabidopsis thaliana</i>       | AtNCED5      | NP_174302.1    |
| <i>Arabidopsis thaliana</i>       | AtNCED6      | NP_189064.1    |
| <i>Arabidopsis thaliana</i>       | AtNCED9      | NP_177960.1    |
| <i>Arabidopsis lyrata</i>         | AlNCED2      | XP_002870052.2 |
| <i>Arabidopsis lyrata</i>         | AlNCED3      | XP_002885045.1 |
| <i>Arabidopsis lyrata</i>         | AlNCED4      | XP_002869997.1 |
| <i>Arabidopsis lyrata</i>         | AlNCED6      | XP_002885610.1 |
| <i>Arabidopsis lyrata</i>         | AlNCED9      | XP_002862994.1 |
| <i>Brassica napus</i>             | BnNCED3      | NP_001302902.1 |
| <i>Capsella rubella</i>           | CarNCED2     | XP_006282855.1 |
| <i>Camelina sativa</i>            | CasNCED6     | ADE80897.1     |
| <i>Chorispora bungeana</i>        | CbNCED1      | AAS68632.2     |
| <i>Citrus clementina</i>          | CcNCED3_1    | XP_006442236.1 |
| <i>Citrus clementina</i>          | CcNCED5      | XP_006449708.1 |
| <i>Citrus clementina</i>          | CcNCED6      | XP_006420602.2 |
| <i>Citrus sinensis</i>            | CisNCED6     | XP_006489810.2 |
| <i>Cryptomeria japonica</i>       | CjNCED       | BAF31898.1     |
| <i>Caragana korshinskii</i>       | CkNCED1      | ACU86971.1     |
| <i>Chrysanthemum x morifolium</i> | CmNCED3a     | BAF36657.2     |
| <i>Coffea canephora</i>           | CocNCED3     | ABA43901.1     |
| <i>Cuscuta reflexa</i>            | CrNCED1      | AAY82458.1     |

|                              |          |                |
|------------------------------|----------|----------------|
| <i>Cuscuta reflexa</i>       | CrNCED2  | AAV82459.1     |
| <i>Capsella rubella</i>      | CrNCED3  | XP_006297265.1 |
| <i>Capsella rubella</i>      | CrNCED5  | XP_006307061.1 |
| <i>Capsella rubella</i>      | CrNCED6  | XP_006300091.1 |
| <i>Capsella rubella</i>      | CrNCED9  | XP_006302015.2 |
| <i>Citrus sinensis</i>       | CsNCED3  | AER70359.1     |
| <i>Cucumis sativus</i>       | CsNCED6  | XP_004150345.1 |
| <i>Daucus carota</i>         | DcNCED1  | NP_001316102.1 |
| <i>Daucus carota</i>         | DcNCED2  | NP_001316098.1 |
| <i>Daucus carota</i>         | DcNCED3  | NP_001316101.1 |
| <i>Dianthus caryophyllus</i> | DicNCED1 | BAN15738.1     |
| <i>Eutrema salsugineum</i>   | EsNCED3  | XP_006407071.1 |
| <i>Eutrema salsugineum</i>   | EsNCED5  | XP_006415513.1 |
| <i>Eutrema salsugineum</i>   | EsNCED6  | XP_006418817.2 |
| <i>Eutrema salsugineum</i>   | EsNCED9  | XP_006389988.2 |
| <i>Fragaria x ananassa</i>   | FaNCED1  | ADU85829.1     |
| <i>Gossypium hirsutum</i>    | GhNCED1  | ADG03462.1     |
| <i>Gentiana lutea</i>        | GINCED1  | AAS47838.1     |
| <i>Glycine max</i>           | GmNCED1  | NP_001241616.2 |
| <i>Ipomoea nil</i>           | InNCED1  | XP_019159612.1 |
| <i>Lactuca serriola</i>      | LasNCED4 | AFA36207.1     |
| <i>Lycium barbarum</i>       | LbNCED2  | AFO85470.1     |
| <i>Lilium formosanum</i>     | LfNCED3  | ACX33872.1     |
| <i>Lactuca sativa</i>        | LsNCED1  | XP_023732975.1 |
| <i>Lactuca sativa</i>        | LsNCED2  | BAE72091.1     |

|                                |          |                |
|--------------------------------|----------|----------------|
| <i>Lactuca sativa</i>          | LsNCED3  | BAE72092.1     |
| <i>Lactuca sativa</i>          | LsNCED4  | BAE72093.1     |
| <i>Malus domestica</i>         | MdNCED1  | AGQ03804.1     |
| <i>Narcissus tazetta</i>       | NtNCED3  | AGT28471.1     |
| <i>Nicotiana tabacum</i>       | NitNCED3 | NP_001313039.1 |
| <i>Pisum sativum</i>           | PsNCED2  | BAC10550.1     |
| <i>Populus trichocarpa</i>     | PtNCED2  | XP_002316871.1 |
| <i>Populus trichocarpa</i>     | PtNCED3  | XP_006370181.1 |
| <i>Populus trichocarpa</i>     | PtNCED6  | XP_002304701.2 |
| <i>Ricinus communis</i>        | RcNCED3  | EEF32866.1     |
| <i>Ricinus communis</i>        | RcNCED5  | EEF42638.1     |
| <i>Ricinus communis</i>        | RcNCED6  | EEF44272.1     |
| <i>Ricinus communis</i>        | RcNCED9  | EEF32866.1     |
| <i>Raphanus sativus</i>        | RsNCED1  | BAF42336.1     |
| <i>Scutellaria baicalensis</i> | SnNCED2  | AGN03861.1     |
| <i>Solanum tuberosum</i>       | StNCED6  | XP_006349526.1 |
| <i>Solanum lycopersicum</i>    | SlNCED6  | XP_010321597.1 |
| <i>Solanum tuberosum</i>       | StNCED1  | NP_001275103.1 |
| <i>Solanum tuberosum</i>       | StNCED2  | NP_001274963.1 |
| <i>Vitis vinifera</i>          | VvNCED1  | AAR11193.1     |
| <i>Vitis vinifera</i>          | VvNCED2  | NP_001268200.1 |
| <i>Vitis vinifera</i>          | VvNCED6  | XP_002283185.1 |
| <i>Physcomitrium patens</i>    | PpNCED4  | XP_024365588.1 |
| <i>Physcomitrium patens</i>    | PpNCED3  | XP_024397835.1 |
| <i>Arachis hypogaea</i>        | AhNCED1  | CAE00459.2     |

---
