# Supplementary material for: Abscisic Acid Synthesis and Signaling during the Ripening of Raspberry (Rubus idaeus ‘Heritage’) Fruit
Source: MDPI journal article supplement (doi:10.3390/plants12091882), 2023-05-05
Supplement: s1 [file s1]

**Table S5.** Information of qPCR primers

| Primer's name | Sequence             | Primer length<br>(bp) | Tm   | % GC | Product length<br>(bp) |
|---------------|----------------------|-----------------------|------|------|------------------------|
| RiNCED1-F     | TGAAAACCGTCGGGAGATA  | 19                    | 59.1 | 47.4 | 154                    |
| RiNCED1-R     | CCGTTAGGCGAGAACTTGA  | 19                    | 59   | 52.6 |                        |
| RiPYL1-F      | AGGAGTTGAAACCCTTCGTG | 20                    | 59.2 | 50   | 159                    |
| RiPYL1-R      | TCCGGATGAAGTGCTTGTAG | 20                    | 58.9 | 50   |                        |
| RiPYL8-F      | TACAAGCCCTTTGTCAGCAG | 20                    | 59.1 | 50   | 167                    |
| RiPYL8-R      | TGATCACCACCAACAATCCT | 20                    | 58.8 | 45   |                        |
