# Supplementary material for: Abscisic Acid Synthesis and Signaling during the Ripening of Raspberry (Rubus idaeus ‘Heritage’) Fruit
Source: MDPI journal article supplement (doi:10.3390/plants12091882), 2023-05-05
Supplement: s1 [file s1]

**Table S4. Information about NCED protein sequences used for phylogenetic analysis.** PYL protein sequences used in phylogenetic analysis. The sequences of PYLs from *Arabidopsis thaliana*, *Fragaria vesca*, *Malus domestica*, *Oryza sativa*, *Setaria italica*, *Vitis vinifera*, *Zea mays*, *Ricinus communis*, *Physcomitrium patens*, and *Theobroma cacao* are available in National Center for Biotechnology Information (<https://www.ncbi.nlm.nih.gov/>). *Triticum aestivum*, *Hordeum vulgare*, *Sorghum bicolor*, *Brachypodium distachyon* genomes are available in the Ensembl plants <https://plants.ensembl.org/index.html>. *Nicotiana tabacum* sequences are available in Bai et al., 2019.

| Specie                      | Protein name | Accession ID   |
|-----------------------------|--------------|----------------|
| <i>Arabidopsis thaliana</i> | AtPYL1       | NP_001331305.1 |
| <i>Arabidopsis thaliana</i> | AtPYL10      | NP_194521.2    |
| <i>Arabidopsis thaliana</i> | AtPYL11      | NP_199398.1    |
| <i>Arabidopsis thaliana</i> | AtPYL12      | NP_199399.1    |
| <i>Arabidopsis thaliana</i> | AtPYL13      | NP_193597.1    |
| <i>Arabidopsis thaliana</i> | AtPYL2       | NP_180174.1    |
| <i>Arabidopsis thaliana</i> | AtPYL3       | NP_177443.1    |
| <i>Arabidopsis thaliana</i> | AtPYL4       | NP_565887.1    |
| <i>Arabidopsis thaliana</i> | AtPYL5       | NP_196163.1    |
| <i>Arabidopsis thaliana</i> | AtPYL6       | NP_565928.1    |
| <i>Arabidopsis thaliana</i> | AtPYL7       | NP_567208.1    |
| <i>Arabidopsis thaliana</i> | AtPYL8       | NP_200128.1    |
| <i>Arabidopsis thaliana</i> | AtPYL9       | NP_563626.1    |
| <i>Fragaria vesca</i>       | FvPYL13a     | XP_004293952.1 |
| <i>Fragaria vesca</i>       | FvPYL13b     | XP_004293951.1 |
| <i>Fragaria vesca</i>       | FvPYL13c     | XP_011460608.1 |
| <i>Fragaria vesca</i>       | FvPYL2       | XP_004291031.1 |
| <i>Fragaria vesca</i>       | FvPYL3       | XP_004300241.1 |
| <i>Fragaria vesca</i>       | FvPYL4       | XP_004302617.1 |
| <i>Fragaria vesca</i>       | FvPYL6       | XP_004308958.1 |
| <i>Fragaria vesca</i>       | FvPYL7       | XP_004306686.1 |
| <i>Fragaria vesca</i>       | FvPYL8a      | XP_011470277.1 |
| <i>Fragaria vesca</i>       | FvPYL8b      | XP_004308004.1 |

|                              |         |                |
|------------------------------|---------|----------------|
| <i>Fragaria vesca</i>        | FvPYL8c | XP_011470277.1 |
| <i>Malus domestica</i>       | MdPYL1  | XP_008350612.1 |
| <i>Malus domestica</i>       | MdPYL10 | XP_008377517.1 |
| <i>Malus domestica</i>       | MdPYL11 | XP_028945528.1 |
| <i>Malus domestica</i>       | MdPYL12 | XP_008351952.1 |
| <i>Malus domestica</i>       | MdPYL13 | XP_008341960.1 |
| <i>Malus domestica</i>       | MdPYL2  | XP_008343633.2 |
| <i>Malus domestica</i>       | MdPYL3  | XP_008380616.1 |
| <i>Malus domestica</i>       | MdPYL4  | XP_008370174.2 |
| <i>Malus domestica</i>       | MdPYL5  | XP_008371472.1 |
| <i>Malus domestica</i>       | MdPYL6  | XP_008373570.1 |
| <i>Malus domestica</i>       | MdPYL7  | XP_008376112.1 |
| <i>Malus domestica</i>       | MdPYL8  | XP_008369296.1 |
| <i>Malus domestica</i>       | MdPYL9  | XP_008376697.2 |
| <i>Oryza sativa Japonica</i> | OsPYL1  | XP_015612857.1 |
| <i>Oryza sativa Japonica</i> | OsPYL10 | XP_015627042.1 |
| <i>Oryza sativa Japonica</i> | OsPYL11 | XP_015627042.1 |
| <i>Oryza sativa Japonica</i> | OsPYL12 | XP_025878812.1 |
| <i>Oryza sativa Japonica</i> | OsPYL13 | BAD46118.1     |
| <i>Oryza sativa Japonica</i> | OsPYL2  | XP_015641755.1 |
| <i>Oryza sativa Japonica</i> | OsPYL3  | XP_015624786.1 |
| <i>Oryza sativa Japonica</i> | OsPYL4  | XP_015643625.1 |
| <i>Oryza sativa Japonica</i> | OsPYL5  | XP_015638073.1 |
| <i>Oryza sativa Japonica</i> | OsPYL6  | XP_015628032.1 |
| <i>Oryza sativa Japonica</i> | OsPYL7  | XP_015641993.1 |
| <i>Oryza sativa Japonica</i> | OsPYL8  | XP_015641857.1 |
| <i>Oryza sativa Japonica</i> | OsPYL9  | XP_015642160.1 |
| <i>Setaria italica</i>       | SiPYL1  | XP_004983564.1 |
| <i>Setaria italica</i>       | SiPYL2  | XP_004951427.1 |
| <i>Setaria italica</i>       | SiPYL3  | XP_004966082.1 |
| <i>Setaria italica</i>       | SiPYL4  | XP_004961771.1 |

|                          |         |                    |
|--------------------------|---------|--------------------|
| <i>Setaria italica</i>   | SiPYL5  | XP_004970455.1     |
| <i>Setaria italica</i>   | SiPYL6  | XP_012700774.1     |
| <i>Setaria italica</i>   | SiPYL7  | XP_004984885.1     |
| <i>Setaria italica</i>   | SiPYL8  | XP_004951286.1     |
| <i>Setaria italica</i>   | SiPYL9  | XP_004960624.1     |
| <i>Vitis vinifera</i>    | VvPYL11 | XP_002272779.1     |
| <i>Vitis vinifera</i>    | VvPYL2  | XP_010648333.1     |
| <i>Vitis vinifera</i>    | VvPYL4  | XP_002277562.1     |
| <i>Vitis vinifera</i>    | VvPYL6  | XP_002272779.1     |
| <i>Vitis vinifera</i>    | VvPYL8  | XP_002270037.3     |
| <i>Vitis vinifera</i>    | VvPYL9  | XP_002281200.1     |
| <i>Zea mays</i>          | ZmPYL1  | NP_001343946.1     |
| <i>Zea mays</i>          | ZmPYL10 | NP_001336882.1     |
| <i>Zea mays</i>          | ZmPYL11 | NP_001140789.1     |
| <i>Zea mays</i>          | ZmPYL12 | XP_035821091.1     |
| <i>Zea mays</i>          | ZmPYL13 | PWZ11971.1         |
| <i>Zea mays</i>          | ZmPYL2  | NP_001150686.2     |
| <i>Zea mays</i>          | ZmPYL3  | NP_001170038.1     |
| <i>Zea mays</i>          | ZmPYL4  | NP_001136477.1     |
| <i>Zea mays</i>          | ZmPYL5  | NP_001148260.1     |
| <i>Zea mays</i>          | ZmPYL6  | NP_001306656.1     |
| <i>Zea mays</i>          | ZmPYL7  | NP_001169534.1     |
| <i>Zea mays</i>          | ZmPYL8  | NP_001334791.1     |
| <i>Zea mays</i>          | ZmPYL9  | NP_001140969.1     |
| <i>Triticum aestivum</i> | TaPYL1A | TraesCS1A01G191700 |
| <i>Triticum aestivum</i> | TaPYL1B | TraesCS1B01G206600 |
| <i>Triticum aestivum</i> | TaPYL1C | TraesCS1D01G195300 |
| <i>Triticum aestivum</i> | TaPYL2A | TraesCS3A01G154400 |
| <i>Triticum aestivum</i> | TaPYL2D | TraesCS3D01G161500 |
| <i>Triticum aestivum</i> | TaPYL3A | TraesCS7A01G358200 |
| <i>Triticum aestivum</i> | TaPYL3B | TraesCS7B01G269600 |

|                          |         |                    |
|--------------------------|---------|--------------------|
| <i>Triticum aestivum</i> | TaPYL3D | TraesCS7D01G364600 |
| <i>Triticum aestivum</i> | TaPYL4A | TraesCS2A01G089400 |
| <i>Triticum aestivum</i> | TaPYL4B | TraesCS2B01G105300 |
| <i>Triticum aestivum</i> | TaPYL4D | TraesCS2D01G087500 |
| <i>Triticum aestivum</i> | TaPYL5A | TraesCS3A01G348400 |
| <i>Triticum aestivum</i> | TaPYL5B | TraesCS3B01G380300 |
| <i>Triticum aestivum</i> | TaPY5D  | TraesCS3D01G342000 |
| <i>Triticum aestivum</i> | TaPYL6A | TraesCS1A01G297600 |
| <i>Triticum aestivum</i> | TaPYL6B | TraesCS1B01G306800 |
| <i>Triticum aestivum</i> | TaPYL6D | TraesCS1D01G293600 |
| <i>Triticum aestivum</i> | TaPYL7A | TraesCS4A01G114400 |
| <i>Triticum aestivum</i> | TaPYL7B | TraesCS4B01G189800 |
| <i>Triticum aestivum</i> | TaPYL7D | TraesCS4D01G191200 |
| <i>Triticum aestivum</i> | TaPYL8A | TraesCS1A01G126800 |
| <i>Triticum aestivum</i> | TaPYL8B | TraesCS1B01G145800 |
| <i>Triticum aestivum</i> | TaPYL8D | TraesCS1D01G126900 |
| <i>Triticum aestivum</i> | TaPYL9A | TraesCS7A01G350800 |
| <i>Triticum aestivum</i> | TaPYL9B | TraesCS7B01G232100 |
| <i>Triticum aestivum</i> | TaPYL9D | TraesCS7D01G328000 |
| <i>Hordeum vulgare</i>   | HvPYL1  | HORVU1Hr1G050110   |
| <i>Hordeum vulgare</i>   | HvPYL2  | HORVU7Hr1G088140   |
| <i>Hordeum vulgare</i>   | HvPYL3  | HORVU3Hr1G031380   |
| <i>Hordeum vulgare</i>   | HvPYL4  | HORVU3Hr1G088100   |
| <i>Hordeum vulgare</i>   | HvPYL5  | HORVU3Hr1G039010   |
| <i>Hordeum vulgare</i>   | HvPYL6  | HORVU1Hr1G070420   |
| <i>Hordeum vulgare</i>   | HvPYL7  | HORVU4Hr1G055220   |
| <i>Hordeum vulgare</i>   | HvPYL8  | HORVU7Hr1G079270   |
| <i>Hordeum vulgare</i>   | HvPYL9  | HORVU3Hr1G107030   |
| <i>Sorghum bicolor</i>   | SbPYL1  | Sobic.001G289100   |
| <i>Sorghum bicolor</i>   | SbPYL2  | Sobic.004G097800   |
| <i>Sorghum bicolor</i>   | SbPYL3  | Sobic.010G169100   |

|                                |         |                  |
|--------------------------------|---------|------------------|
| <i>Sorghum bicolor</i>         | SbPYL4  | Sobic.001G403300 |
| <i>Sorghum bicolor</i>         | SbPYL5  | Sobic.009G170700 |
| <i>Sorghum bicolor</i>         | SbPYL6  | Sobic.003G342000 |
| <i>Sorghum bicolor</i>         | SbPYL7  | Sobic.009G080200 |
| <i>Sorghum bicolor</i>         | SbPYL8  | Sobic.004G113800 |
| <i>Brachypodium distachyon</i> | BdPYL1  | Bradi3g34070     |
| <i>Brachypodium distachyon</i> | BdPYL2  | Bradi3g08580     |
| <i>Brachypodium distachyon</i> | BdPYL3  | Bradi1g37810     |
| <i>Brachypodium distachyon</i> | BdPYL4  | Bradi1g16710     |
| <i>Brachypodium distachyon</i> | BdPYL5  | Bradi1g65130     |
| <i>Brachypodium distachyon</i> | BdPYL6  | Bradi2g22510     |
| <i>Brachypodium distachyon</i> | BdPYL7  | Bradi2g53840     |
| <i>Brachypodium distachyon</i> | BdPYL8  | Bradi3g09580     |
| <i>Brachypodium distachyon</i> | BdPYL9  | Bradi2g32250     |
| <i>Ricinus comunis</i>         | RcPYRL1 | XP_002519819.1   |
| <i>Ricinus comunis</i>         | RcPYRL2 | XP_002516457.1   |
| <i>Ricinus comunis</i>         | RcPYRL3 | XP_002526675.1   |
| <i>Ricinus comunis</i>         | RcPYRL4 | XP_002520792.1   |
| <i>Ricinus comunis</i>         | RcPYRL5 | XP_002523369.1   |
| <i>Ricinus comunis</i>         | RcPYRL6 | XP_002513580.1   |
| <i>Ricinus comunis</i>         | RcPYRL7 | XP_002509950.1   |
| <i>Physcomitrium patens</i>    | PpPYL9  | XP_024380918.1   |
| <i>Physcomitrium patens</i>    | PpPYL8  | XP_024366744.1   |
| <i>Physcomitrium patens</i>    | PpPYL9  | XP_024385413.1   |
| <i>Theobroma cacao</i>         | TcPYRL1 | XP_007039500.1   |
| <i>Theobroma cacao</i>         | TcPYRL2 | EOY29881.1       |
| <i>Theobroma cacao</i>         | TcPYRL3 | XP_007024469.1   |
| <i>Theobroma cacao</i>         | TcPYRL4 | XP_007026589.1   |
| <i>Theobroma cacao</i>         | TcPYRL5 | EOY17664.1       |
| <i>Theobroma cacao</i>         | TcPYRL6 | XP_007025367.1   |
| <i>Theobroma cacao</i>         | TcPYRL7 | EOY24998.1       |

|                          |         |                |
|--------------------------|---------|----------------|
| <i>Theobroma cacao</i>   | TcPYRL8 | EOY23471.1     |
| <i>Theobroma cacao</i>   | TcPYRL9 | XP_007051579.1 |
| <i>Nicotiana tabacum</i> | NtPYL1  | Ntab0128790    |
| <i>Nicotiana tabacum</i> | NtPYL2  | Ntab0298740    |
| <i>Nicotiana tabacum</i> | NtPYL3  | Ntab0331800    |
| <i>Nicotiana tabacum</i> | NtPYL4  | Ntab0409250    |
| <i>Nicotiana tabacum</i> | NtPYL5  | Ntab0524600    |
| <i>Nicotiana tabacum</i> | NtPYL6  | Ntab0746900    |
| <i>Nicotiana tabacum</i> | NtPYL7  | Ntab0790100    |
| <i>Nicotiana tabacum</i> | NtPYL8  | Ntab0830710    |
| <i>Nicotiana tabacum</i> | NtPYL9  | Ntab0986250    |
| <i>Nicotiana tabacum</i> | NtPYL10 | Ntab0025750    |
| <i>Nicotiana tabacum</i> | NtPYL11 | Ntab0143100    |
| <i>Nicotiana tabacum</i> | NtPYL12 | Ntab0143110    |
| <i>Nicotiana tabacum</i> | NtPYL13 | Ntab0350690    |
| <i>Nicotiana tabacum</i> | NtPYL14 | Ntab0528630    |
| <i>Nicotiana tabacum</i> | NtPYL15 | Ntab0012440    |
| <i>Nicotiana tabacum</i> | NtPYL16 | Ntab0764650    |
| <i>Nicotiana tabacum</i> | NtPYL17 | Ntab0430230    |
| <i>Nicotiana tabacum</i> | NtPYL18 | Ntab0710100    |
| <i>Nicotiana tabacum</i> | NtPYL19 | Ntab0177250    |
| <i>Nicotiana tabacum</i> | NtPYL20 | Ntab0568440    |
| <i>Nicotiana tabacum</i> | NtPYL21 | Ntab0424430    |
| <i>Nicotiana tabacum</i> | NtPYL22 | Ntab0906880    |
| <i>Nicotiana tabacum</i> | NtPYL23 | Ntab0217080    |
| <i>Nicotiana tabacum</i> | NtPYL24 | Ntab0010710    |
| <i>Nicotiana tabacum</i> | NtPYL25 | Ntab0725950    |
| <i>Nicotiana tabacum</i> | NtPYL26 | Ntab0504840    |
| <i>Nicotiana tabacum</i> | NtPYL27 | Ntab0868560    |
| <i>Nicotiana tabacum</i> | NtPYL28 | Ntab0282050    |

*Nicotiana tabacum*

NtPYL29

Ntab0734960

---
